# Supplementary material for: Persons with Dementia Living at Home or in Nursing Homes in Nine Swedish Urban or Rural Municipalities
Source: MDPI journal article supplement (doi:10.3390/healthcare7020080), 2019-06-25
Supplement: s1 [file s1]

**Table S1.** Descriptive data of the inhabitants in the participating municipalities (as at 31 December 2014), and the study's attrition rate.

| <b>Municipality</b> | <b>Inhabitants</b> | <b>Inhabitants<br/>≥65 years (%)</b> | <b>Inhabitants<br/>≥85 years (%)</b> | <b>Living in Rural<br/>Areas (%)</b> | <b>Attrition Rate<br/>HC/NH (%)</b> |
|---------------------|--------------------|--------------------------------------|--------------------------------------|--------------------------------------|-------------------------------------|
| 1 *                 | 28,737             | 5778 (20)                            | 833 (3)                              | 20                                   | 89/60                               |
| 2                   | 8256               | 1943 (24)                            | 289 (4)                              | 13 **                                | 86/57                               |
| 3 *                 | 27,522             | 6294 (23)                            | 921 (3)                              | 26                                   | 91/55                               |
| 4 *                 | 9549               | 2475 (26)                            | 340 (4)                              | 22                                   | 87/55                               |
| 5                   | 12,198             | 3380 (28)                            | 574 (5)                              | 36                                   | 86/57                               |
| 6                   | 9222               | 2260 (25)                            | 382 (4)                              | 23                                   | 86/58                               |
| 7                   | 86,970             | 15,934 (18)                          | 2,235 (3)                            | 12                                   | 83/60                               |
| 8 *                 | 15,908             | 3379 (21)                            | 560 (4)                              | 25                                   | 88/57                               |
| 9                   | 19,505             | 4159 (21)                            | 653 (3)                              | 28                                   | 100/60                              |

HC = home care; NH = nursing homes. \* Rural area. \*\* Most people were living in small villages not located in rural areas.
